# Supplementary material for: Fabrication of a paper-based facile and low-cost microfluidic device and digital imaging technique for point-of-need monitoring of hypochlorite
Source: Royal Society of Chemistry journal article supplement (doi:10.1039/d3an00533j), 2023-01-01
Supplement: d3an00533j1.pdf [file d3an00533j1.pdf]

## **Electronic Supplementary Information**

### **Fabrication of Paper-based Facile and Low-cost Microfluidic Device and Digital Imaging Technique for Point-of-Need Monitoring of Hypochlorite**

**Snehasish Debnath<sup>a,b</sup>, Riya Ghosh,<sup>a,b</sup> Pragti,<sup>c</sup> Suman Mukhopadhyay,<sup>\*c</sup> Kamesh Viswanathan Baskaran,<sup>\*d</sup> Pabitra B. Chatterjee<sup>\*a,b</sup>**

<sup>a</sup>Analytical & Environmental Science Division and Centralized Instrument Facility,  
CSIR-CSMCRI, G. B. Marg, Bhavnagar, India.

<sup>b</sup>Academy of Scientific and Innovative Research (AcSIR), Ghaziabad-201002, India.

<sup>c</sup>Department of Chemistry, Indian Institute of Technology Indore, Indore, India.

<sup>d</sup>Dr. K. C. Patel Research & Development Centre, Charotar University of Science and  
Technology, Changa, India.

**Corresponding author:** [pbchatterjee@csmcri.res.in](mailto:pbchatterjee@csmcri.res.in)

## Experimental Section

The image capture parameter is given below, and it is carried out by Thermo iBright FL 1000 imaging system (used for molecular biology for gel imaging system).

| Sl. No. | Parameter         | Value                                              |
|---------|-------------------|----------------------------------------------------|
| 1.      | Digital camera    | 9 megapixels                                       |
| 2.      | Zoom Optical      | 1.3x                                               |
| 3.      | Zoom Digital      | 1x                                                 |
| 4.      | Exposure time     | 25-30 ms for background<br>30-50 ms for samples    |
| 5.      | Excitation filter | 455-485 nm filter and captured at 470 nm for probe |
| 6.      | Emission filter   | 586-617 nm filter and captured at 592 nm for probe |

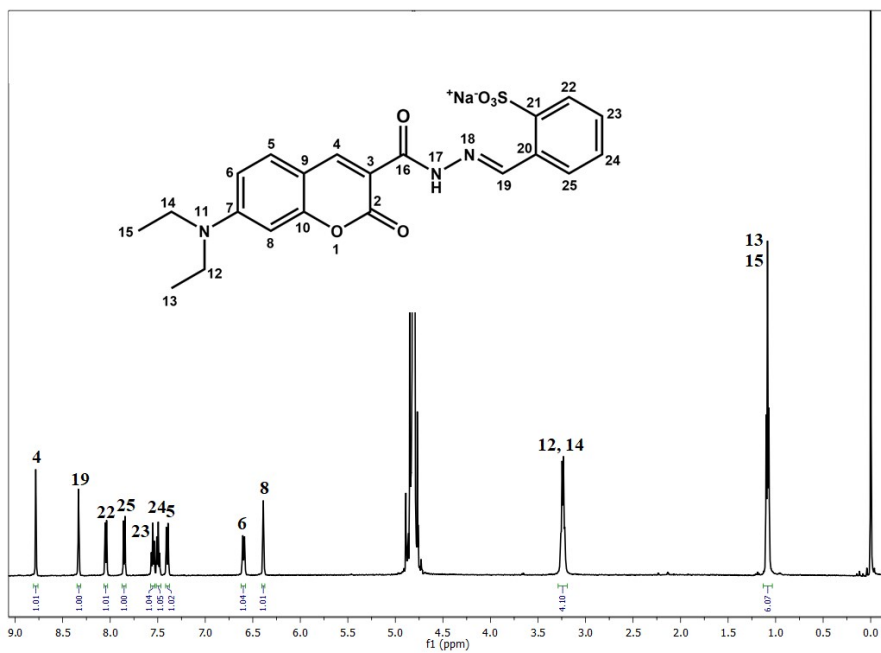

Fig. S1 <sup>1</sup>H NMR spectrum of 1 in D<sub>2</sub>O.

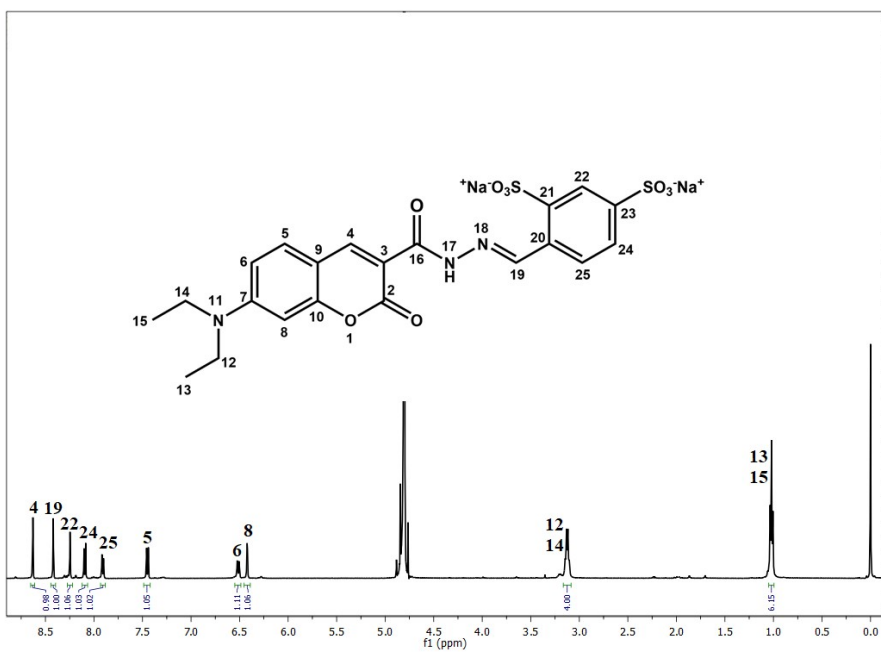

Fig. S2 <sup>1</sup>H NMR spectrum of 2 in D<sub>2</sub>O.

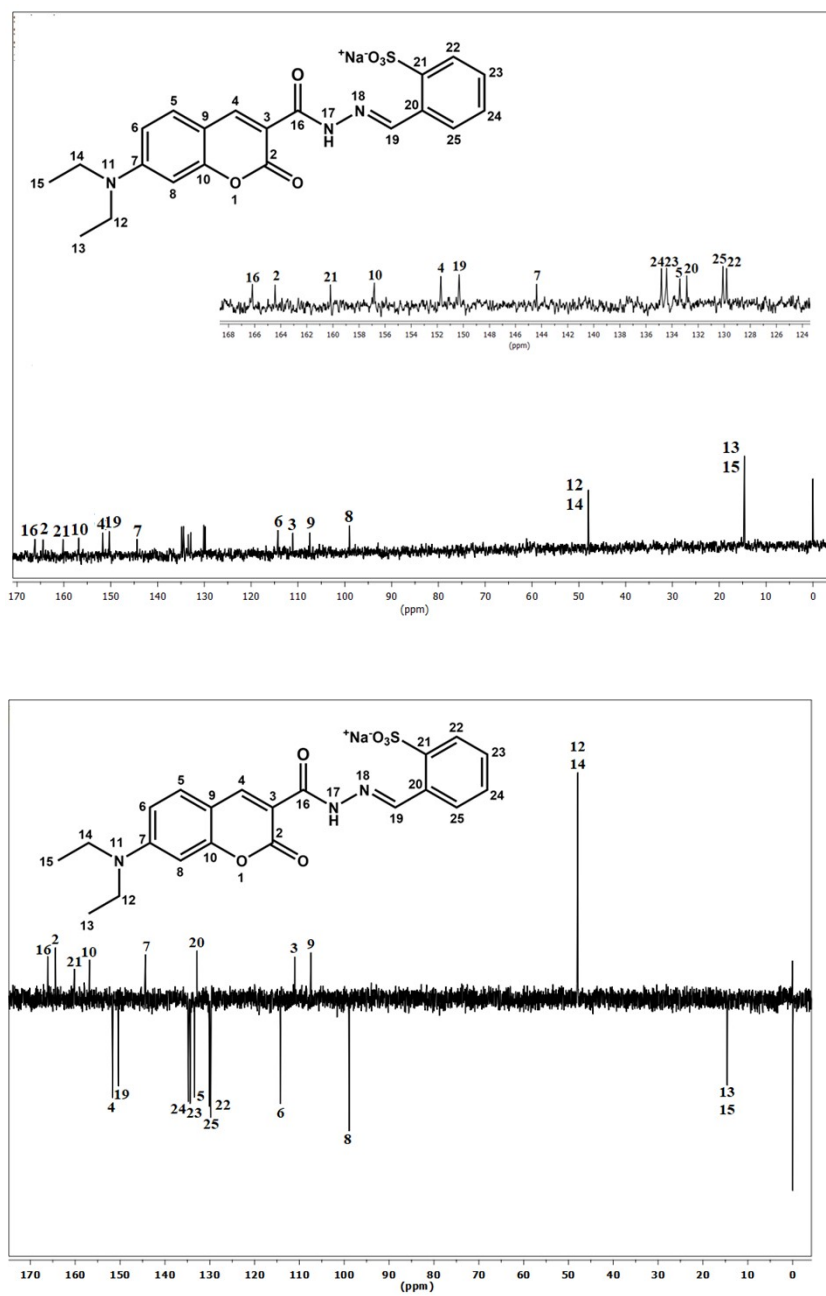

**Fig. S3** <sup>13</sup>C (top) and DEPTQ NMR (bottom) spectra of 1 in D<sub>2</sub>O.

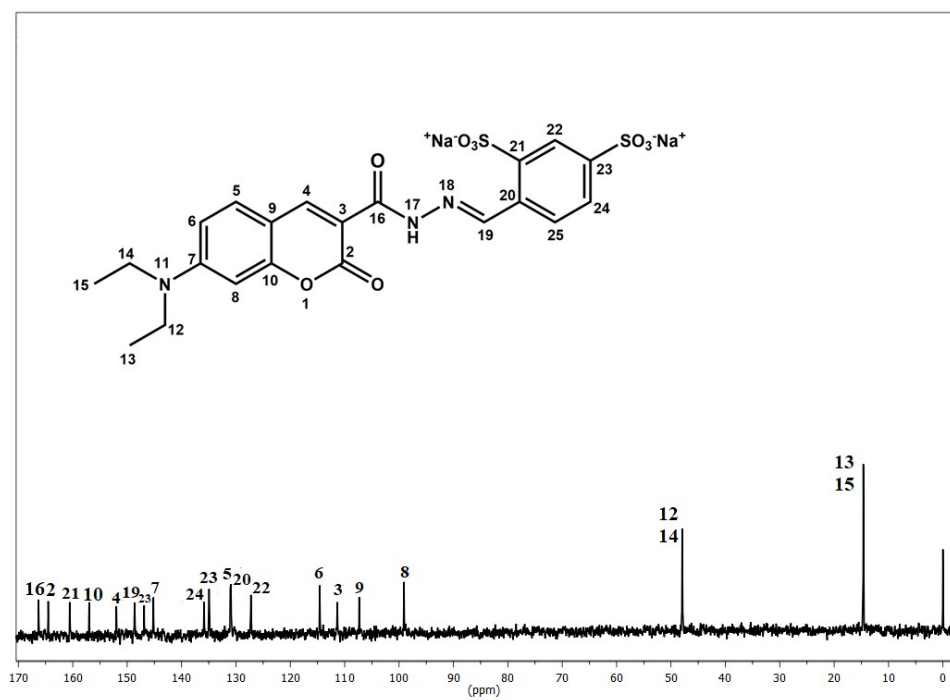

**Fig. S4**  $^{13}\text{C}$  NMR spectrum of 2 in  $\text{D}_2\text{O}$ .

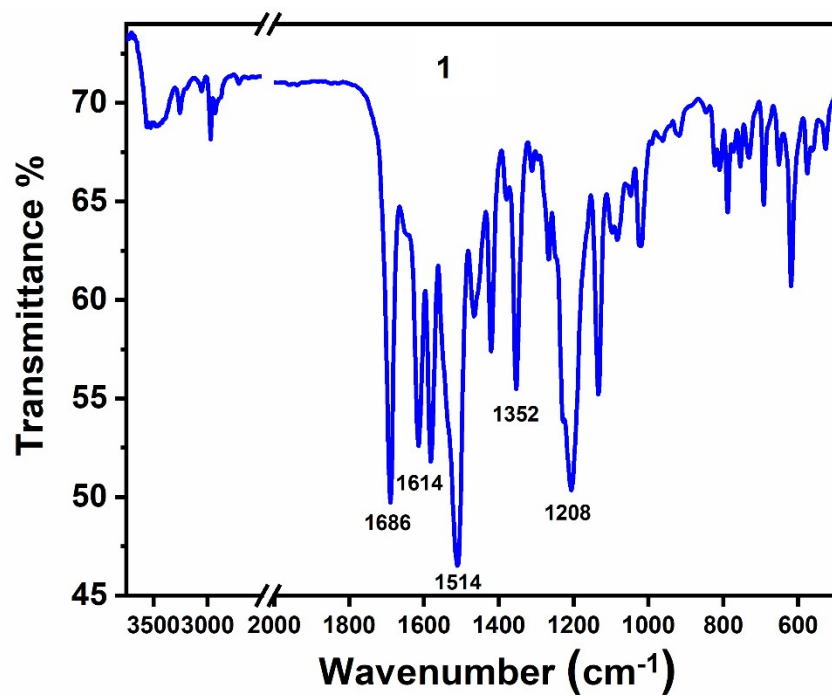

Fig. S5 FT-IR spectrum of 1.

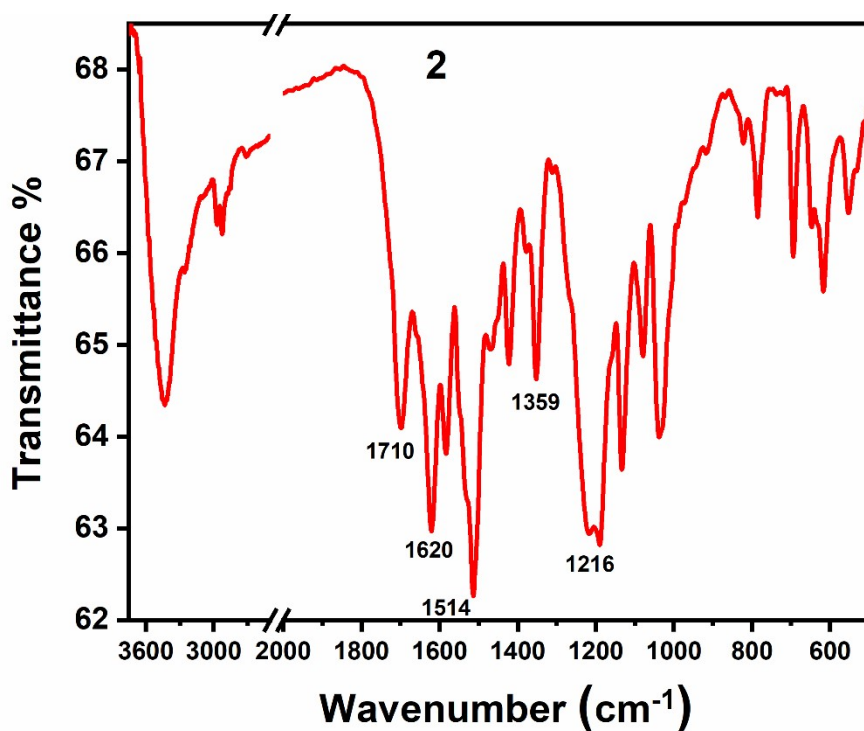

Fig. S6 FT-IR spectrum of 2.

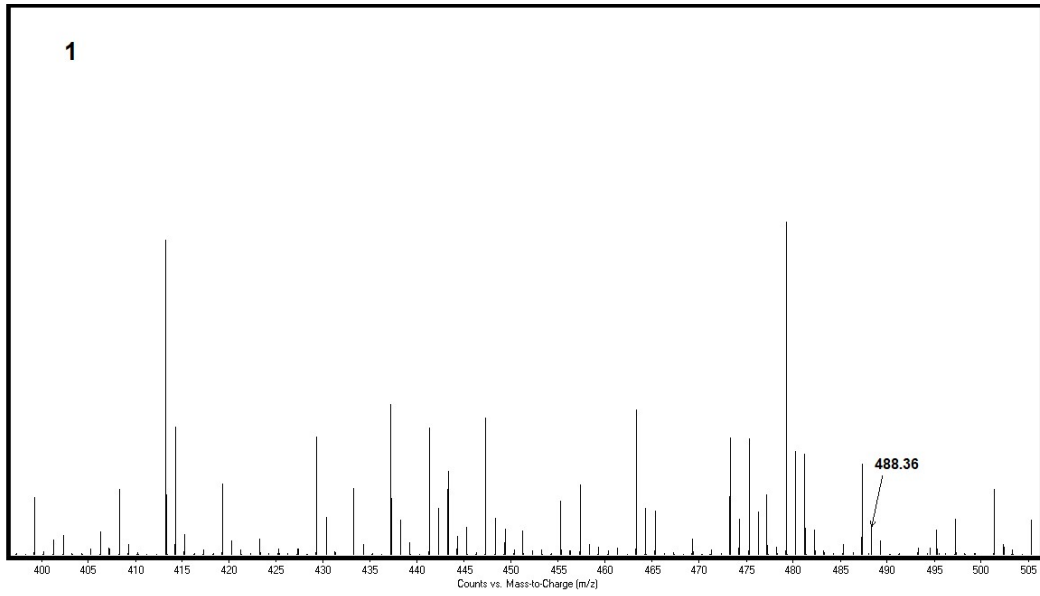

**Fig. S7** ESI-MS of 1.

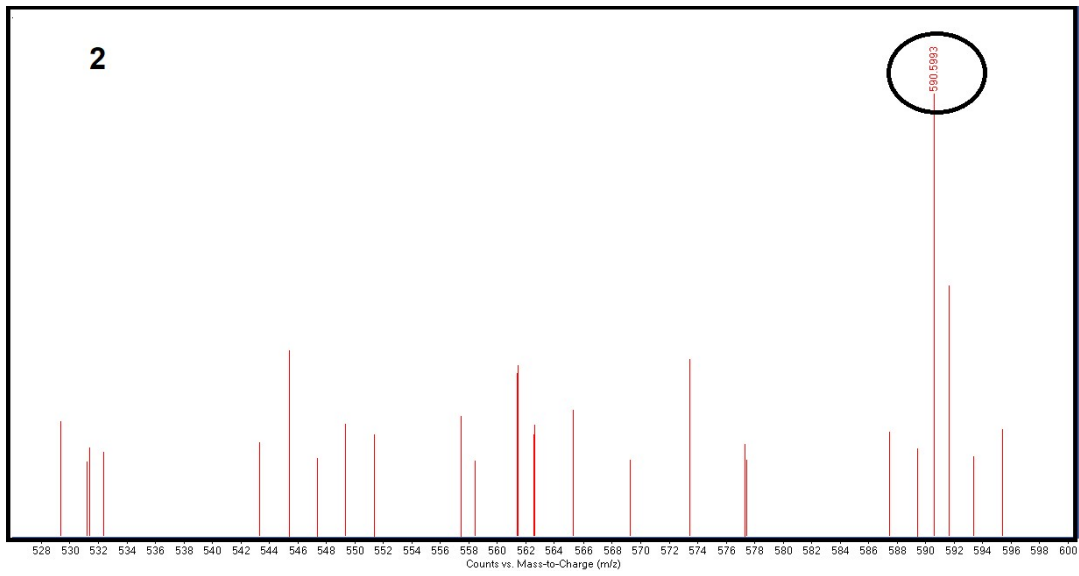

**Fig. S8** ESI-MS of 2.

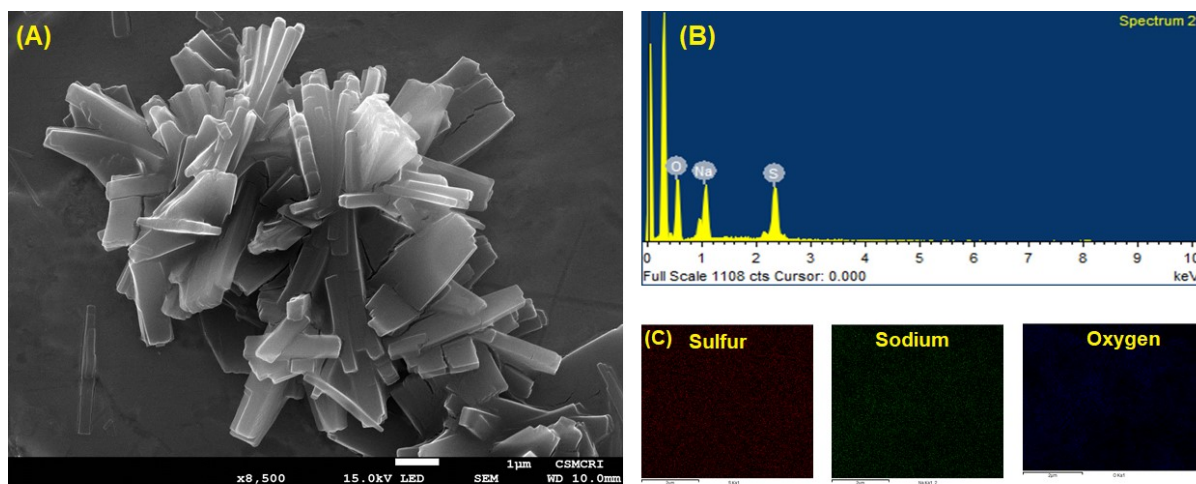

**Fig. S9** (A) SEM image profile of 1. (B) SEM-EDX profile, and (C) elemental mapping of 1 showing traces of sulfur, sodium, and oxygen.

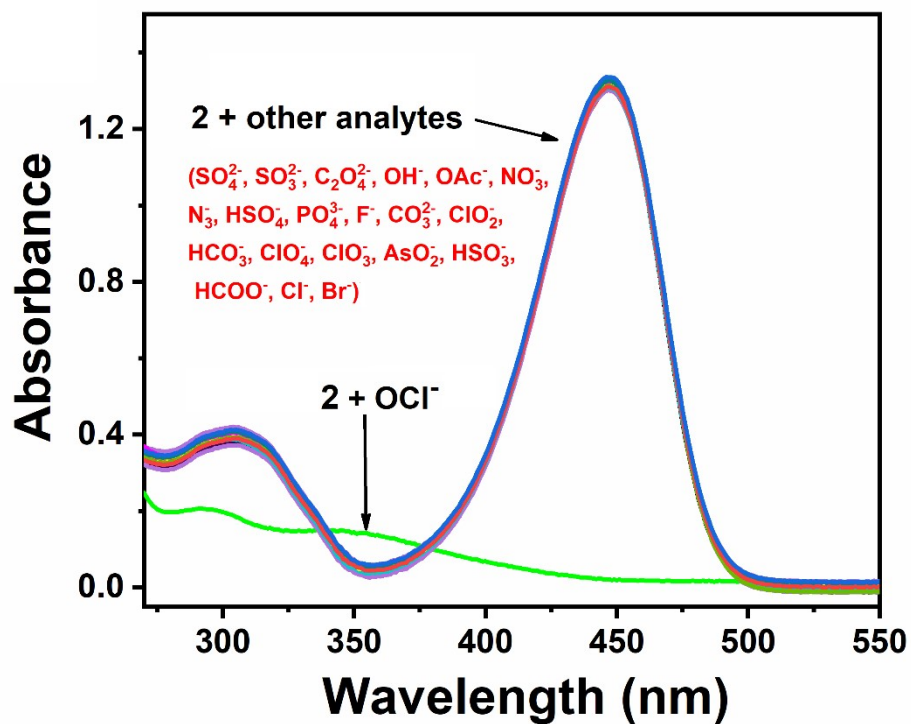

**Fig. S10** UV-vis selectivity profile of 2 (B) in the presence of different anionic species (250  $\mu$ M) in 10 mM aqueous PBS buffer at 7.4 pH.



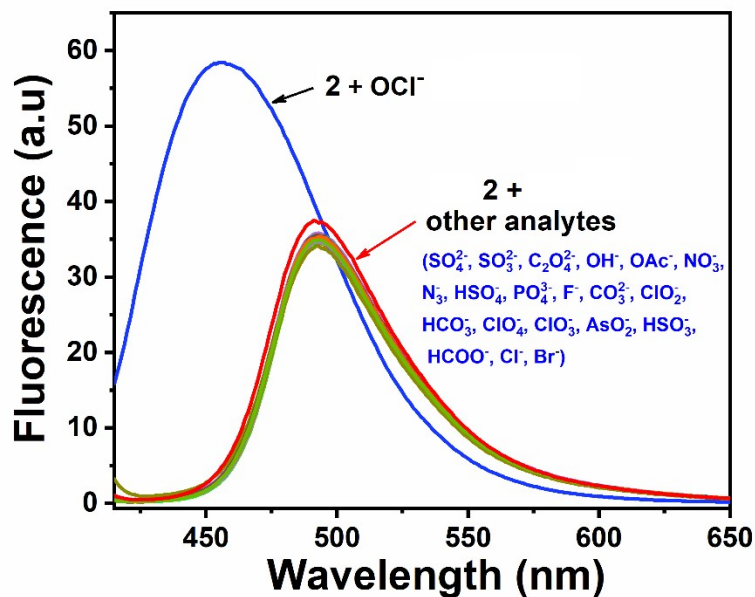

**Fig. S11** Fluorometric response of 20  $\mu\text{M}$  **2** towards 12.5 equivalents of different anionic species in 10 mM aqueous PBS buffer at 7.4 pH. The excitation wavelength was set at 400 nm.

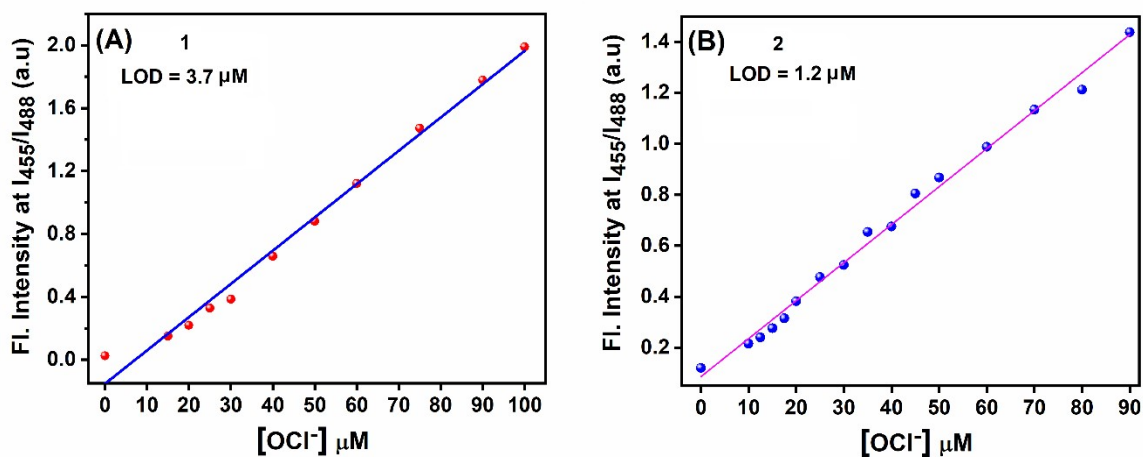

**Fig. S12** Linear fitting plots of the fluorescence titration data points of **1** (A) and **2** (B) with varying concentrations of  $\text{OCl}^-$ . The excitation wavelength was set at 400 nm.

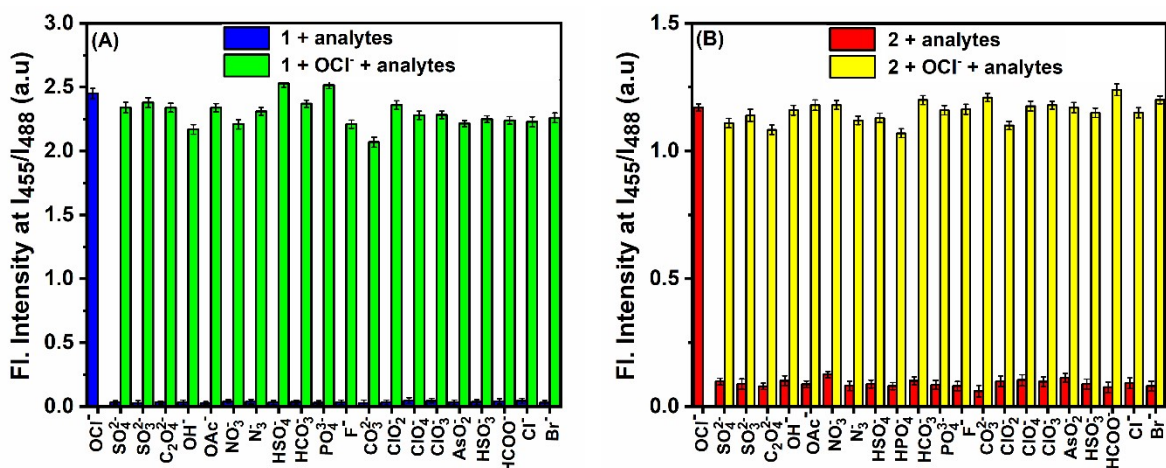

**Fig. S13** Fluorescence-based interference data during OCl<sup>-</sup> detection by 1 (A) and 2 (B) in the presence of excess competing analytes in 10 mM aqueous PBS buffer at 7.4 pH. The excitation wavelength was set at 400 nm.

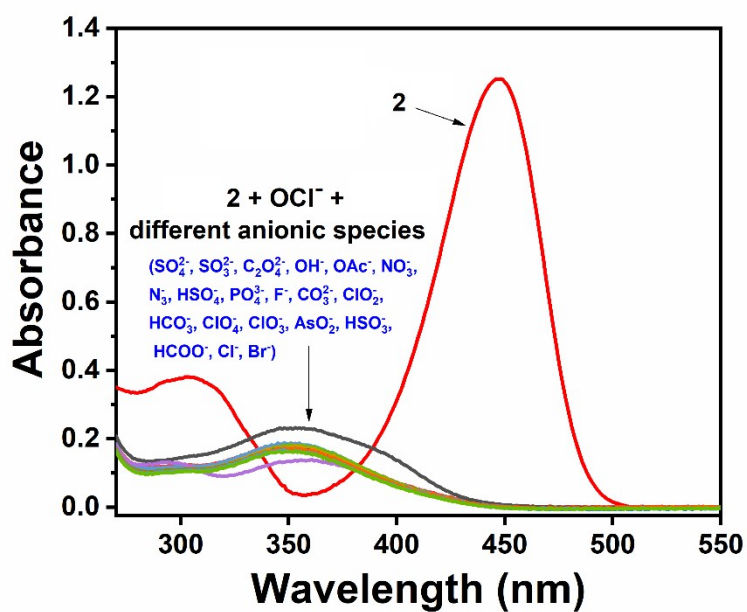

**Fig. S14** UV-vis-based interference data for OCl<sup>-</sup> detection by 2 in the presence of excess competing analytes in 10 mM aqueous PBS buffer at 7.4 pH.

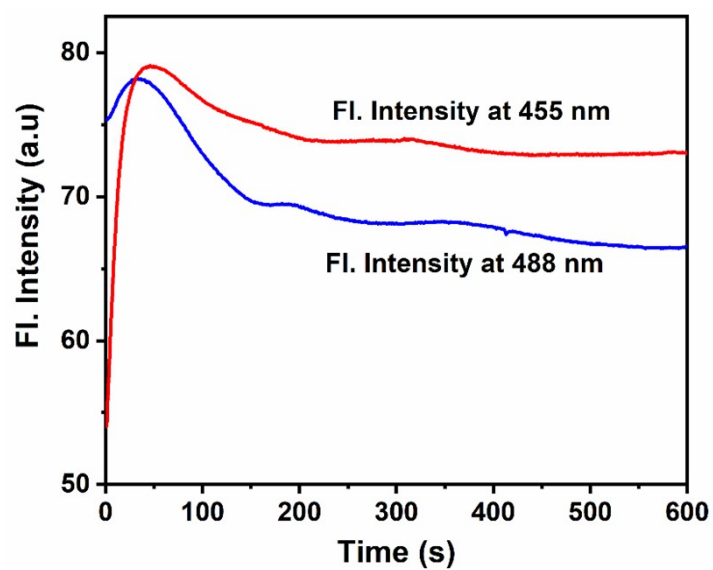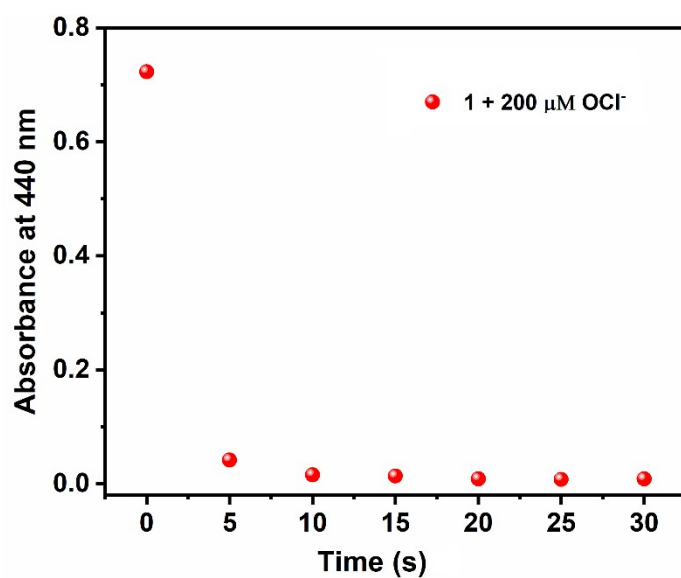

**Fig. S15** Time-dependent fluorescence intensity (top) and UV-vis (bottom) changes of 1 (20 μM) in the presence of 200 μM OCl<sup>-</sup> in PBS buffer solution (10 mM, pH = 7.4).

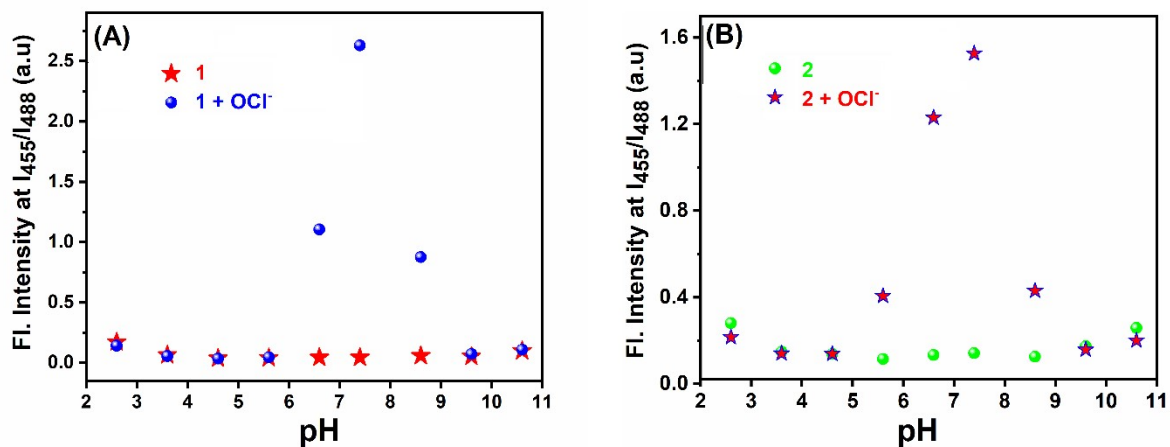

**Fig. S16** Change in fluorescence intensities of 1 (A) and 2 (B) in the presence and absence of 200  $\mu\text{M}$   $\text{OCl}^-$  in PBS buffer solution (10 mM, pH = 7.4) under variable pH conditions. The excitation was set at 400 nm.

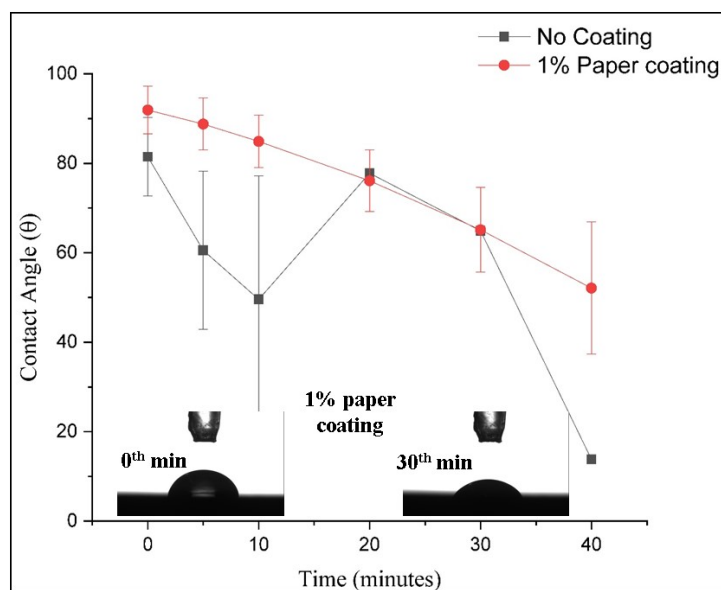

**Fig. S17** Contact angle vs. time plot of the paper without coating and with 1 % paper coating.

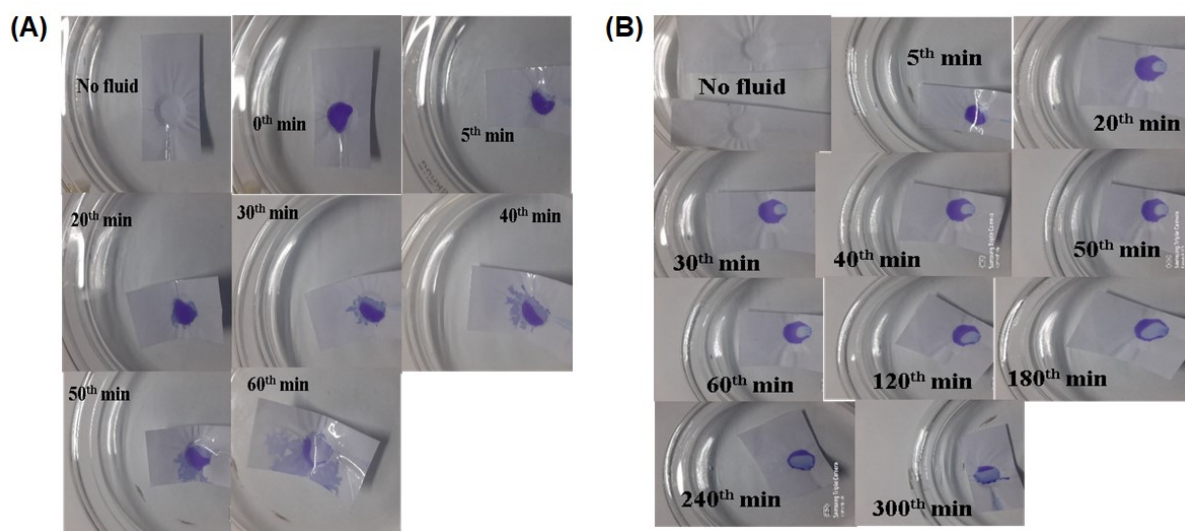

**Fig. S18** Fluid holding images of a paper chip with time tested by methylene blue without coating (A) and with 1% polystyrene coated paper (B).

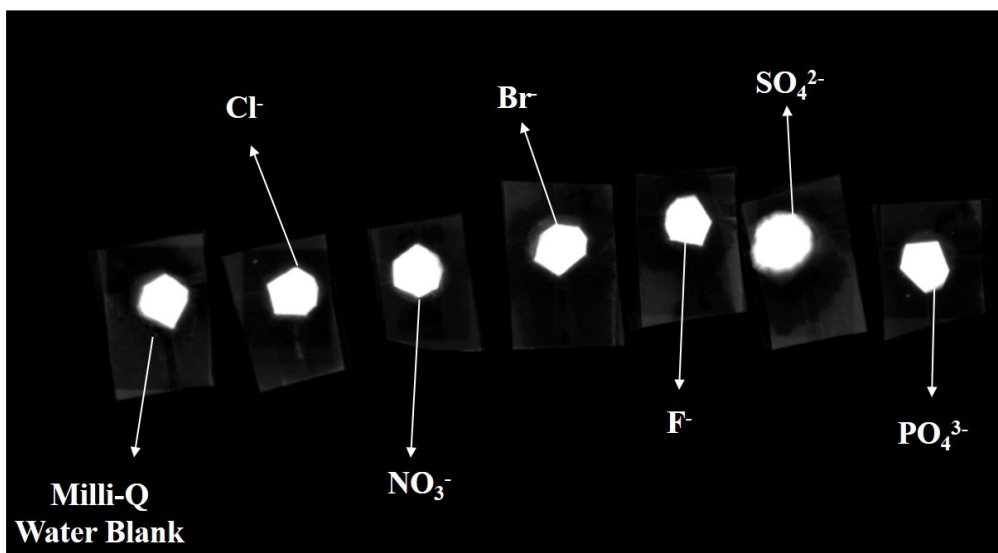

**Fig. S19** Fluorescent images of 1@ $\mu$ PADs toward various anions such as  $\text{Cl}^-$ ,  $\text{NO}_3^-$ ,  $\text{Br}^-$ ,  $\text{F}^-$ ,  $\text{SO}_4^{2-}$  and  $\text{PO}_4^{3-}$  at 250  $\mu\text{M}$  solution captured by gel doc imaging system.

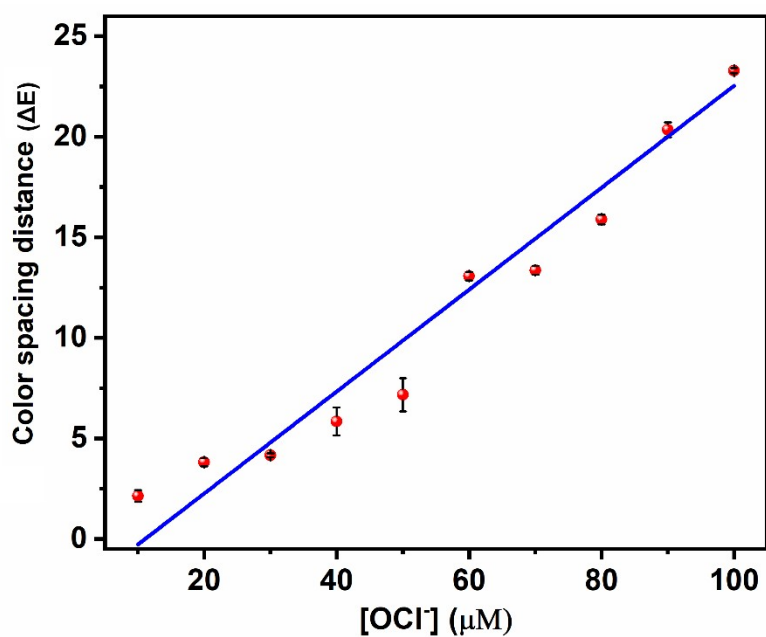

**Fig. S20** Linear calibration plot of 1@ $\mu$ PAD via fluorescence technique with colour spacing distance vs. various concentrations of  $\text{OCl}^-$ .

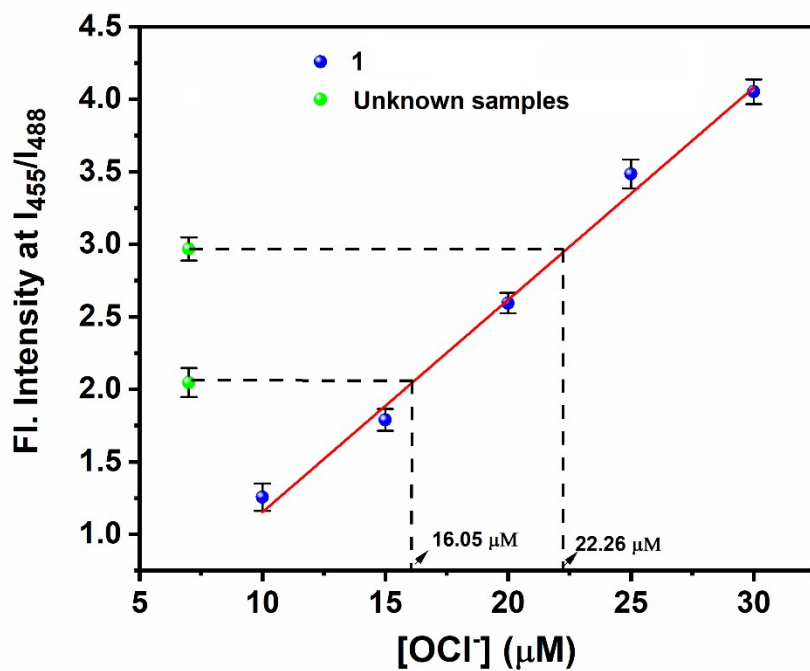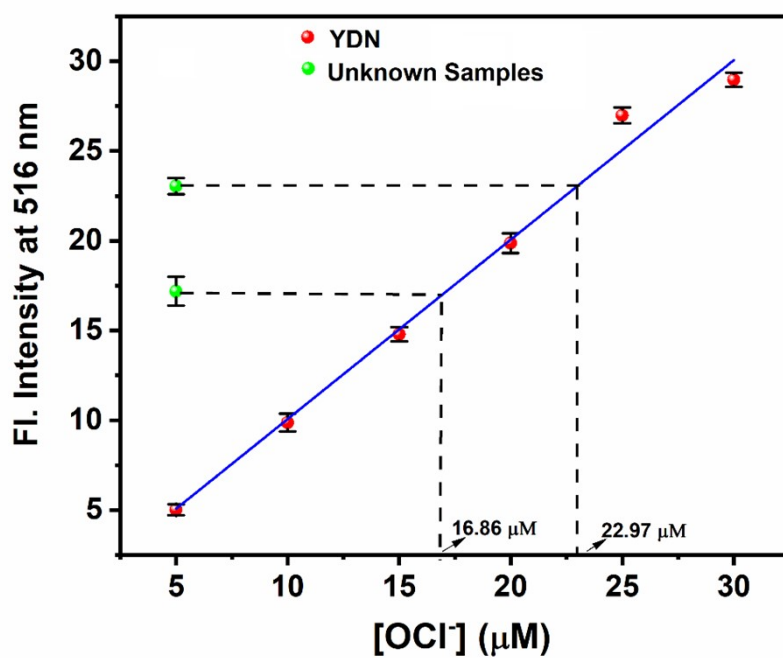

**Fig. S21** Unknown concentration measurements of  $\text{OCI}^-$  using (a) compound 1 and (b) YDN. Fluorimetric linear calibration plot in PBS buffer solution (10 mM, pH = 7.4) was used.

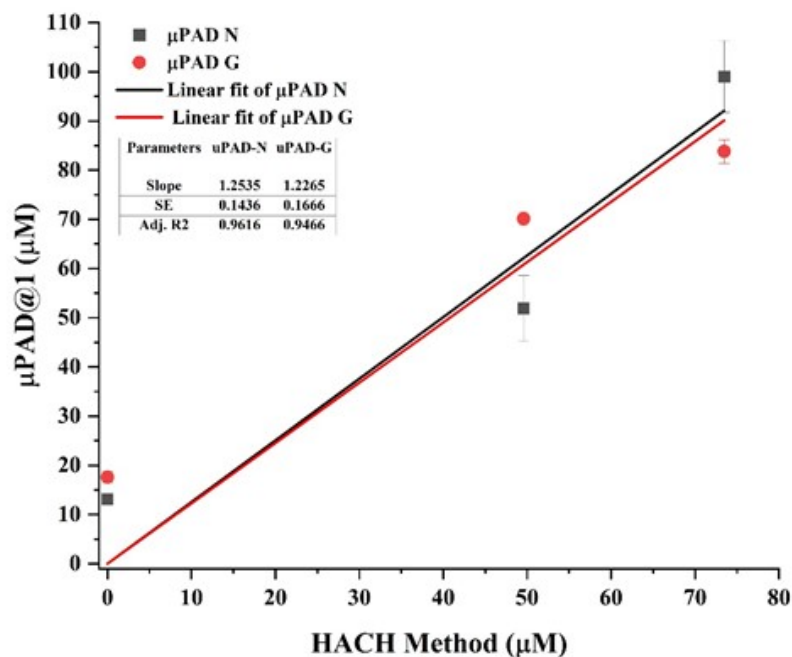

**Fig. S22** 1:1 Analytical validation of various concentrations of  $\text{OCl}^-$  between 1@ $\mu\text{PAD}$  ( $\mu\text{PAD}$  -N (Narmada) &  $\mu\text{PAD}$ -G (Ground water)) and HACH method.

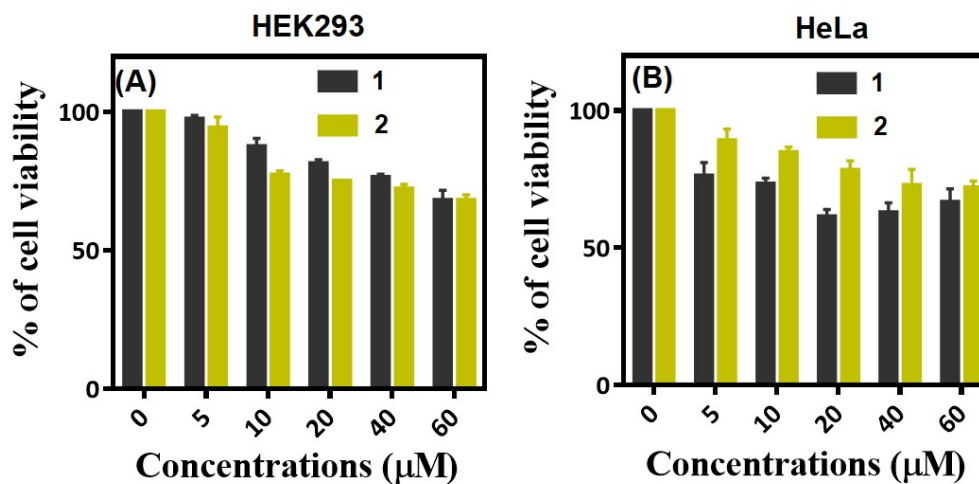

**Fig. S23** Cytotoxicity profiles of 1 and 2 with HEK293 (A) and HeLa (B) cells.



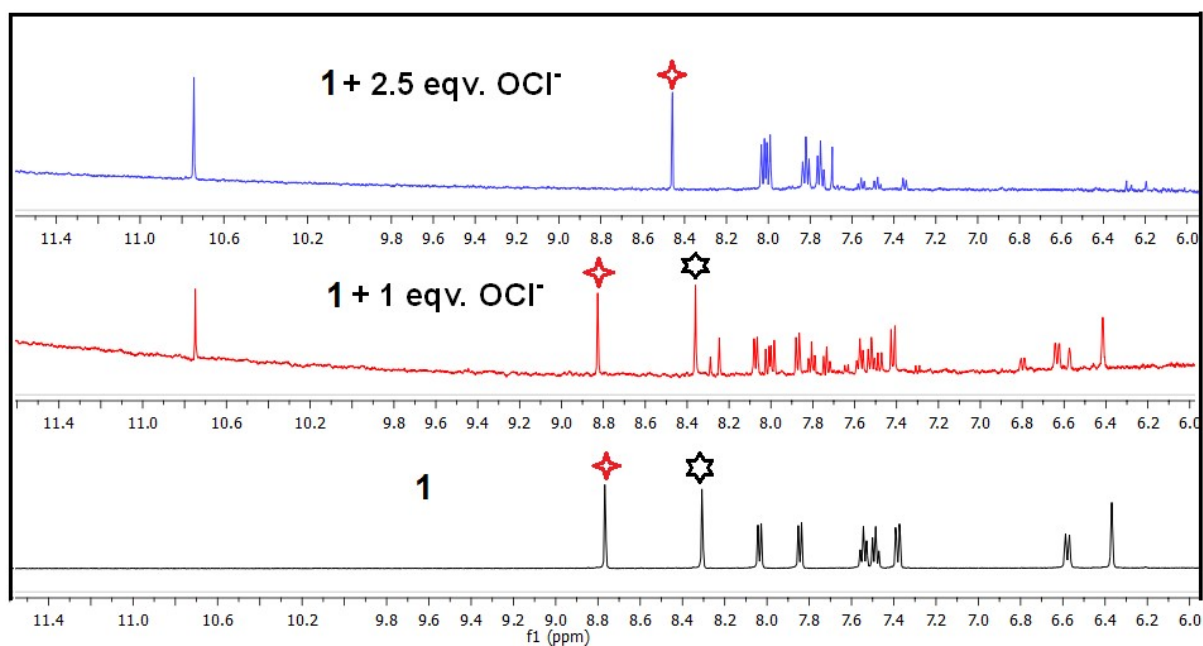

**Fig. S24**  $^1\text{H}$  NMR profiles of **1** in the absence and presence of different equivalents of  $\text{OCl}^-$  in  $\text{D}_2\text{O}$  solution (Red astericks indicate imine proton peak, black astericks indicate proton peak of the adjacent position of the coumarin acetyl moiety).

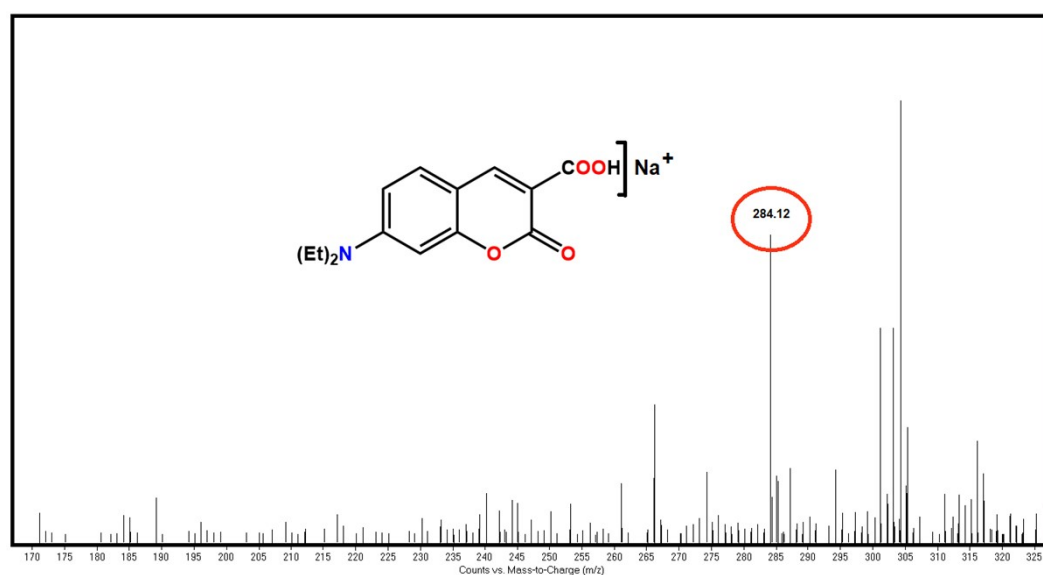

**Fig. S25** ESI-MS spectrum of **1** upon addition of  $\text{OCl}^-$ .

Table S1. Comparison of the current embossing  $\mu$ PAD technique with the existing printing techniques.

| Sl. No. | Type of Fabrication | Advantage                                                                                                                                                                                                        | Disadvantage                                                                                                                                                                                                                                                                                                                                                                                                         |
|---------|---------------------|------------------------------------------------------------------------------------------------------------------------------------------------------------------------------------------------------------------|----------------------------------------------------------------------------------------------------------------------------------------------------------------------------------------------------------------------------------------------------------------------------------------------------------------------------------------------------------------------------------------------------------------------|
| 1       | Laser Printing      | <ol style="list-style-type: none"> <li>1. Commercial tonner, high resolution.</li> <li>2. Simple to print using commercial devices.</li> <li>3. Fabricate to print the hydrophobic walls in 2D.</li> </ol>       | <ol style="list-style-type: none"> <li>1. Printing equipment is required.</li> <li>2. Additional heating step.</li> <li>3. Limited to the use of specific materials for printing purpose.</li> <li>4. Ability to do 3D with extensive process.</li> <li>5. Not compatibility for all types analytical reagents.</li> <li>6. Ability to retain the fluid in the capillary of the substrate &lt;10 minutes.</li> </ol> |
| 2       | Wax Printing        | <ol style="list-style-type: none"> <li>1. Requires wax printer, hotplate, and solid wax.</li> <li>2. Simple and fast fabrication process.</li> <li>3. Fabricate to print the hydrophobic walls in 2D.</li> </ol> | <ol style="list-style-type: none"> <li>1. Low resolution and requires heating step.</li> <li>2. Wax spreads on edges of the barriers.</li> <li>3. Ability to do 3D with extensive process.</li> <li>4. Ability to retain the fluid in the capillary of the substrate &lt;10 minutes.</li> <li>5. Not compatible for all types analytical reagents.</li> </ol>                                                        |
| 3       | Embossing           | <ol style="list-style-type: none"> <li>1. Fabrication by plastic mold for 2D and adhesive tapes helps for 3D in paper substrate.</li> <li>2. Flexible, foldable, lightweight, portable,</li> </ol>               | <ol style="list-style-type: none"> <li>1. Low resolution.</li> <li>2. Susceptible to contamination.</li> <li>3. Requires polymer coating on the substrate.</li> </ol>                                                                                                                                                                                                                                                |

|   |                       |                                                                                                                                                                                                                                                                                                      |                                                                                                                                                                                                                                                                                                                                                             |
|---|-----------------------|------------------------------------------------------------------------------------------------------------------------------------------------------------------------------------------------------------------------------------------------------------------------------------------------------|-------------------------------------------------------------------------------------------------------------------------------------------------------------------------------------------------------------------------------------------------------------------------------------------------------------------------------------------------------------|
|   |                       | <p>and disposable.</p> <ol style="list-style-type: none"> <li>Low cost.</li> <li>Possibility of mass production.</li> <li>Compatible for all types' analytical reagents.</li> </ol>                                                                                                                  |                                                                                                                                                                                                                                                                                                                                                             |
| 3 | 3D printing           | <ol style="list-style-type: none"> <li>Requires 3D printer and 3D printer resin.</li> <li>Fast and accessible to mass production.</li> </ol>                                                                                                                                                         | <ol style="list-style-type: none"> <li>Resolution depends on 3D printer equipment.</li> <li>High cost</li> </ol>                                                                                                                                                                                                                                            |
| 4 | Craft cutting         | <ol style="list-style-type: none"> <li>Requires digital craft cutter.</li> <li>Lightweight, flexible, portable, and disposable.</li> </ol>                                                                                                                                                           | <ol style="list-style-type: none"> <li>Requires external pumping mechanism.</li> <li>Low resolution</li> <li>Devices are difficult to manipulate and usually require a polymer backing.</li> </ol>                                                                                                                                                          |
| 5 | Screen-printing       | <ol style="list-style-type: none"> <li>Requires for mask for patterning and wax.</li> <li>Hydrophobic patterning like UV curable ink, carbon, silver/silver chloride ink, etc.</li> <li>Low cost and simple fabrication process.</li> <li>Fabricate to print the hydrophobic walls in 2D.</li> </ol> | <ol style="list-style-type: none"> <li>Low resolution</li> <li>Unadaptable to mass production.</li> <li>New screen required for each design.</li> <li>Ability to retain the fluid in the capillary of the substrate &lt;10 minutes.</li> <li>Not compatible for all types analytical reagents.</li> <li>Ability to do 3D with extensive process.</li> </ol> |
| 6 | Flexographic Printing | <ol style="list-style-type: none"> <li>Requires customized printing equipment.</li> <li>Hydrophobic chemicals like polystyrene and PDMS for applicable</li> </ol>                                                                                                                                    | <ol style="list-style-type: none"> <li>High cost</li> <li>Complex preparation and cleaning.</li> <li>Printing quality depends on surface to roughness of the</li> </ol>                                                                                                                                                                                     |

|   |                                       |                                                                                                                                                                                                                                                                                                                                                                                                                                                                                   |                                                                                                                                                                                                                                                                                                                                                             |
|---|---------------------------------------|-----------------------------------------------------------------------------------------------------------------------------------------------------------------------------------------------------------------------------------------------------------------------------------------------------------------------------------------------------------------------------------------------------------------------------------------------------------------------------------|-------------------------------------------------------------------------------------------------------------------------------------------------------------------------------------------------------------------------------------------------------------------------------------------------------------------------------------------------------------|
|   |                                       | <p>roll-to-roll process.</p> <ol style="list-style-type: none"> <li>3. No heating step.</li> <li>4. Ability to fabricate in 3D.</li> </ol>                                                                                                                                                                                                                                                                                                                                        | <p>paper.</p>                                                                                                                                                                                                                                                                                                                                               |
| 7 | Inkjet Printing                       | <ol style="list-style-type: none"> <li>1. Requires printing equipment.</li> <li>2. Requires hydrophobic chemical and UV curable acrylate ink.</li> <li>3. High resolution</li> <li>4. Fabricate to print the hydrophobic walls in 2D.</li> </ol>                                                                                                                                                                                                                                  | <ol style="list-style-type: none"> <li>1. Requires customised inkjet printer.</li> <li>2. Requires solvent treatment of the paper.</li> <li>3. Not compatible for all types analytical reagents.</li> <li>4. Ability to do 3D with extensive process.</li> <li>5. Ability to retain the fluid in capillary of the substrate for &lt; 10 minutes.</li> </ol> |
| 8 | Current embossing technique $\mu$ PAD | <ol style="list-style-type: none"> <li>1. Same as embossing technique. Coating with 1 % polystyrene in paper helps in hydrophobic conditions and ability to retain the fluid for &gt; 60 min as shown in Fig. S18B.</li> <li>2. Probe was coated on the filter paper and sealed with adhesive tape to react with the analyte uniformly and avoid of susceptible to contamination.</li> <li>3. Surface to roughness of the paper didn't affect the flow due to external</li> </ol> | <ol style="list-style-type: none"> <li>1. Low resolution.</li> <li>2. Requires polymer coating of paper.</li> </ol>                                                                                                                                                                                                                                         |

|  |  |                                                                                                                                                                                                                                                        |  |
|--|--|--------------------------------------------------------------------------------------------------------------------------------------------------------------------------------------------------------------------------------------------------------|--|
|  |  | <p>pumping (micropipette pressure).</p> <ol style="list-style-type: none"><li>4. Possibility of mass production by systematic process.</li><li>5. Easy and low cost fabrication process of testing new probe.</li><li>6. No heating process.</li></ol> |  |
|--|--|--------------------------------------------------------------------------------------------------------------------------------------------------------------------------------------------------------------------------------------------------------|--|

Table S2. Comparative literatures on 100 % aqueous soluble OCl<sup>-</sup> specific optical probes.

| Probe                                                                                                                                                 | $\lambda_{\text{ex}}$ and $\lambda_{\text{em}}$ | Buffer pH                   | Technique                                 | Response time                | Reference    |
|-------------------------------------------------------------------------------------------------------------------------------------------------------|-------------------------------------------------|-----------------------------|-------------------------------------------|------------------------------|--------------|
| 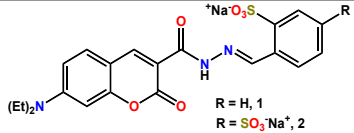 <p>R = H, 1<br/>R = SO<sub>3</sub><sup>-</sup>Na<sup>+</sup>, 2</p> | 400 and 455/488                                 | PBS buffer                  | Ratiometric fluorescence, and colorimetry | 10 s (UV vis) and 60 s (Fl.) | Present work |
|                                                                      | 520 and 541                                     | Sodium phosphate buffer 7.4 | Fluorescence                              | 2 min                        | 1            |
|  <p>R = H<br/>R = Et</p>                                             | 542 and 560                                     | Water 7                     | Fluorescence and colorimetry              | 5 min                        | 2            |
|  <p>R = H, CM1<br/>R = CH<sub>3</sub>, CM2</p>                      | 405 and 480                                     | PBS buffer 7.4              | Fluorescence                              | Within sec                   | 3            |
|                                                                    | 690 and 786                                     | PBS buffer 7.4              | Fluorescence                              | 100 sec                      | 4            |
|  <p>R = COOH<br/>R = NH<sub>2</sub></p>                            | 400 and 503                                     | PBS buffer 7.4              | Fluorescence and UV-vis                   | Within secs                  | 5            |
|                                                                    | 405 and 505                                     | PBS buffer 7.4              | Fluorescence (off) and UV-vis ratiometric | 150 s                        | 6            |

|                                                                                     |             |                                            |                                           |              |    |
|-------------------------------------------------------------------------------------|-------------|--------------------------------------------|-------------------------------------------|--------------|----|
| 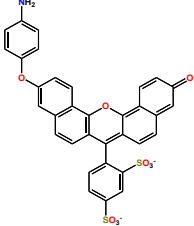   | 614 and 676 | PBS buffer (7.4)                           | Fluorescence                              |              | 7  |
|    | 470 and 558 | PBS buffer (7.4)                           | Fluorescence and colorimetry              | 3 s          | 8  |
|   | 450 and 550 | PBS buffer (7.4)                           | Fluorescence and UV-vis                   | 60 s         | 9  |
|  | 498 and 523 | KH <sub>2</sub> PO <sub>4</sub> buffer 7.4 | Fluorescence                              |              | 10 |
|  | 560 and 610 | PBS buffer 7.4                             | Fluorescence and colorimetry              | Within 1 min | 11 |
|  | 520 and 580 | HEPES buffer solution 7.4                  | Ratiometric fluorescence, and colorimetry | Within 2 min | 12 |
|  | 485 and 516 | PBS buffer 7.4                             | Fluorescence and colorimetry              | 2 min        | 13 |

|                                                                                                                       |                 |                  |                                        |              |    |
|-----------------------------------------------------------------------------------------------------------------------|-----------------|------------------|----------------------------------------|--------------|----|
| 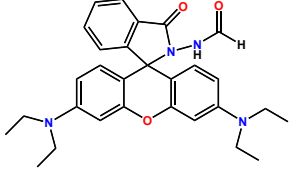                                     | 520 and 580     | PBS buffer (7.4) | Fluorescence and colorimetry           | Within 3 sec | 14 |
|                                      | 600 and 672     | PBS buffer (7.4) | Fluorometry off and colorimetry        | 5 sec        | 15 |
|                                      | 580 and 626     | PBS buffer (7.4) | Fluorometry off and colorimetry        | 10 min       | 16 |
|                                      | 505 and 580     | PBS buffer 7.4   | Fluorescence and UV-vis ratiometric    | 4 s          | 17 |
| <br>R = Me, FCN 1<br>R = Et, FCN 2 | 415 and 485     | HEPES buffer 7.4 | Fluorescence                           | 20 min       | 18 |
|                                    | 488 and 496/713 | PBS buffer 7.4   | Ratiometric fluorescence and UV-vis    | NA           | 19 |
|                                    | 500 and 567/629 | PBS buffer 7.4   | Fluorometric on ratiometric and UV-vis | 10 s         | 20 |



Table S3. Fluid comparison table between paper chips fabricated by laser toner printed vs. embossed using micropipette vs. embossed using capillary driven.

| <b>Sl. No.</b> | <b>Type of paper chip</b>                                     | <b>Fluid insertion timing</b> | <b>Fluid insertion</b>                                |
|----------------|---------------------------------------------------------------|-------------------------------|-------------------------------------------------------|
| 1              | Embossed paper chip using capillary based fluid insertion     | 14 s                          | Improper                                              |
| 2              | Laser wax printed paper using capillary based fluid insertion | 3 min 51 s                    | Proper with longer time                               |
| 3              | Embossed paper chip using Micropipette based fluid insertion  | 20 s                          | Proper with shorter time like mini paper based tubes. |

The total volume of methylene blue used in the experiment is 40  $\mu$ L.

Table S4. Colour standard chart for 1 (20  $\mu\text{M}$ ) towards  $\text{OCI}^-$  via visible spectrophotometer and digital camera colour variation taken in a cuvette.

| Colour Standard chart from Digital Camera |                |                     |                |                         | Colour Standard chart from Visible spectrophotometer |                 |                |                         | Colour Differences between Digital Camera and Visible Spectrophotometer ( $\Delta E$ ) |
|-------------------------------------------|----------------|---------------------|----------------|-------------------------|------------------------------------------------------|-----------------|----------------|-------------------------|----------------------------------------------------------------------------------------|
| NaOCI Std. Conc.                          | L (R)          | a (G)               | b (B)          | C. chart ( $\Delta E$ ) | L (R)                                                | a (G)           | b (B)          | C. chart ( $\Delta E$ ) |                                                                                        |
| Blank                                     | 74.35<br>(164) | -<br>28.05(<br>195) | 56.50<br>(72)  | <b>0</b>                | 93.98<br>(244)                                       | -17.76<br>(245) | 66.60<br>(102) | <b>0</b>                | 14.84                                                                                  |
| 10 $\mu\text{M}$                          | 74.30<br>(164) | -27.48<br>(194)     | 55.59<br>(74)  | $0.6 \pm 0.4$           | 94.02<br>(244)                                       | -17.51<br>(245) | 65.16<br>(106) | $0.41 \pm 0.2$          | 14.79                                                                                  |
| 20 $\mu\text{M}$                          | 73.89<br>(164) | -26.33<br>(193)     | 52.05<br>(81)  | $1.4 \pm 0.5$           | 94.14<br>(244)                                       | -16.95<br>(245) | 60.88<br>(116) | $1.5 \pm 0.3$           | 15.01                                                                                  |
| 30 $\mu\text{M}$                          | 73.67<br>(164) | -25.14<br>(192)     | 48.79<br>(87)  | $2.5 \pm 0.9$           | 94.30<br>(244)                                       | -16.33<br>(245) | 56.74<br>(125) | $2.6 \pm 0.7$           | 15.10                                                                                  |
| 40 $\mu\text{M}$                          | 74.07<br>(167) | -23.02<br>(192)     | 43.72<br>(99)  | $4.1 \pm 1.1$           | 94.45<br>(243)                                       | -15.18<br>(245) | 50.14<br>(140) | $4.6 \pm 1.07$          | 14.67                                                                                  |
| 50 $\mu\text{M}$                          | 73.60<br>(168) | -19.81<br>(189)     | 36.40<br>(112) | $6.7 \pm 1.8$           | 94.72<br>(243)                                       | -13.53<br>(245) | 42.14<br>(157) | $7.2 \pm 1.5$           | 14.91                                                                                  |
| 60 $\mu\text{M}$                          | 73.07<br>(170) | -15.28<br>(186)     | 27.01<br>(129) | $10.6 \pm 2.5$          | 95.02<br>(243)                                       | -11.14<br>(245) | 32.39<br>(178) | $10.7 \pm 1.9$          | 15.20                                                                                  |
| 70 $\mu\text{M}$                          | 72.86<br>(172) | -10.04<br>(183)     | 17.04<br>(147) | $15.6 \pm 3.8$          | 95.28<br>(243)                                       | -8.05<br>(245)  | 22.19<br>(198) | $15.1 \pm 3.03$         | 15.35                                                                                  |
| 80 $\mu\text{M}$                          | 72.90<br>(175) | -6.20<br>(182)      | 9.90<br>(161)  | $19.4 \pm 3$            | 95.50<br>(243)                                       | -5.65<br>(244)  | 14.90<br>(213) | $18.5 \pm 2.6$          | 15.39                                                                                  |
| 90 $\mu\text{M}$                          | 72.70<br>(176) | -2.92<br>(180)      | 4.34<br>(170)  | $23.1 \pm 2.5$          | 95.57<br>(243)                                       | -3.32<br>(244)  | 8.54<br>(226)  | $21.9 \pm 2.2$          | 15.52                                                                                  |
| 100 $\mu\text{M}$                         | 73.03<br>(178) | -1.45<br>(180)      | 1.89<br>(176)  | $24.7 \pm 1.6$          | 95.70<br>(243)                                       | -2.12<br>(244)  | 5.32<br>(232)  | $23.7 \pm 1.6$          | 15.30                                                                                  |

Note: All the samples were analyzed in the cuvette was repeatability and reproducibility of n=10 to demonstrate the probe performance.

Table S5. Colour standard chart for 1@ $\mu$ PAD towards OCl<sup>-</sup> via fluorescence detection in the imaging system.

| Concentration<br>of NaOCl<br>( $\mu$ M) | Colour Representation for Fluorescent intensity |     |     |                   |                     |                 |
|-----------------------------------------|-------------------------------------------------|-----|-----|-------------------|---------------------|-----------------|
|                                         | R                                               | G   | B   | Luminosity<br>(L) | delta E             | Colour<br>Chart |
| 0                                       | 127                                             | 127 | 127 | 53.18 $\pm$ 0.3   | 0                   |                 |
| 10                                      | 124                                             | 124 | 124 | 51.00 $\pm$ 0.6   | 2.14 $\pm$<br>0.2   |                 |
| 20                                      | 116                                             | 116 | 116 | 49.33 $\pm$ 0.3   | 3.82 $\pm$<br>0.2   |                 |
| 30                                      | 137                                             | 137 | 137 | 48.99 $\pm$ 0.1   | 4.16 $\pm$<br>0.1   |                 |
| 40                                      | 111                                             | 111 | 111 | 47.33 $\pm$ 0.5   | 5.84 $\pm$<br>0.7   |                 |
| 50                                      | 109                                             | 109 | 109 | 46.00 $\pm$ 0.5   | 7.17 $\pm$<br>0.82  |                 |
| 60                                      | 94                                              | 94  | 94  | 39.67 $\pm$ 0.6   | 13.07 $\pm$<br>0.21 |                 |
| 70                                      | 92                                              | 92  | 92  | 39.33 $\pm$ 0.6   | 13.36 $\pm$<br>0.22 |                 |
| 80                                      | 85                                              | 85  | 85  | 36.33 $\pm$ 0.5   | 15.89 $\pm$<br>0.24 |                 |
| 90                                      | 73                                              | 73  | 73  | 30.67 $\pm$ 0.5   | 20.35 $\pm$<br>0.37 |                 |
| 100                                     | 64                                              | 64  | 64  | 26.67 $\pm$ 0.1   | 23.29 $\pm$<br>0.13 |                 |

Note: All the samples were analyzed in  $\mu$ PAD was repeatability and reproducibility with n=3 to demonstrate the probe performance.

Table S6. Comparison table of analytical limits in various detection systems.

| Sl. No. | Type of analysis                                    | Fitting method | Detection Limit ( $\mu\text{M}$ ) | Limit of quantification ( $\mu\text{M}$ ) | Fitting Equation     | R value |
|---------|-----------------------------------------------------|----------------|-----------------------------------|-------------------------------------------|----------------------|---------|
| 1       | Digital Camera image colour analysis                | Linear         | 16.83                             | 168.33                                    | $0.27308x - 3.74194$ | 0.94    |
| 2       | Visible spectrophotometer colour analysis           | Linear         | 13.73                             | 137.28                                    | $0.26083x - 3.33861$ | 0.95    |
| 3       | Visible spectrophotometer absorption analysis       | Linear         | 4.52                              | 45.25                                     | $0.01215x - 0.04029$ | 0.98    |
| 4       | Paper chip-based fluorescence camera image analysis | Linear         | 13.34                             | 133.41                                    | $0.2056x$            | 0.99    |

Table S7. Comparative table showing concentration of measured  $\text{OCl}^-$  using a reported probe YDN and current probe 1.

| Quantitative analysis of $\text{OCl}^-$ |                                                                    |                                           |         |
|-----------------------------------------|--------------------------------------------------------------------|-------------------------------------------|---------|
| Samples                                 | [ $\text{OCl}^-$ ] measured using a reported fluorescent probe YDN | [ $\text{OCl}^-$ ] measured using probe 1 | Error % |
| Unknown Sample - 1                      | 16.86 $\mu\text{M}$                                                | 16.05 $\mu\text{M}$                       | 5 %     |
| Unknown Sample - 2                      | 22.97 $\mu\text{M}$                                                | 22.26 $\mu\text{M}$                       | 3 %     |

Table S8. Colour standard chart for 1@ $\mu\text{PAD}$  for the sample analysis via fluorescence detection in the imaging system.

| Sample | Water samples with added $\text{NaOCl}$ ( $\mu\text{M}$ ) | Digital camera image colour analysis via fluorescence technique |                 | Color representation for fluorescent intensity |
|--------|-----------------------------------------------------------|-----------------------------------------------------------------|-----------------|------------------------------------------------|
|        |                                                           | Obtained ( $\mu\text{M}$ )                                      | Recovery %      |                                                |
| R1B N  | -                                                         | 13.09 $\pm$ 0.4                                                 | -               |                                                |
| R1B G  |                                                           | 17.59 $\pm$ 1.1                                                 | -               |                                                |
| S1R N  | 69                                                        | 78.88 $\pm$ 2.7                                                 | 96.1 $\pm$ 0.3  |                                                |
| S1R G  |                                                           | 87.73 $\pm$ 1.4                                                 | 101.6 $\pm$ 0.2 |                                                |
| S2R N  | 96                                                        | 112.12 $\pm$ 1.3                                                | 102.7 $\pm$ 0.2 |                                                |
| S2R G  |                                                           | 111.42 $\pm$ 2.4                                                | 98.1 $\pm$ 0.3  |                                                |

Note: G means groundwater samples collected from the CHARUSAT University campus, and N means Narmada river water samples collected from Kevadia, Gujarat, India. All the samples were analyzed in  $\mu\text{PAD}$  was repeatability and reproducibility with  $n=3$  to demonstrate the probe performance.



## Notes and references

- 1 Z. -N. Sun, F.-Q. Liu, Y. Chen, P. K. H. Tam and D. Yang, *Org. Lett.*, 2008, **10**, 2171–2174.
- 2 A. P. Singh, O. G. Tsay, D. P. Murale, T. Jun, H. Liew, Y.-H. Suh and D. G. Churchill, *Analyst*, 2013, **138**, 2829.
- 3 G. Li, D. Zhu, Q. Liu, L. Xue and H. Jiang, *Org. Lett.*, 2013, **15**, 2002–2005.
- 4 G. Cheng, J. Fan, W. Sun, J. Cao, C. Hu and X. Peng, *Chem. Commun.*, 2014, **50**, 1018–1020.
- 5 J.-T. Hou, B. Wang, Y. Zou, P. Fan, X. Chang, X. Cao, S. Wang and F. Yu, *ACS Sens.*, 2020, **5**, 1949–1958.
- 6 B. Zhang, X. Yang, R. Zhang, Y. Liu, X. Ren, M. Xian, Y. Ye and Y. Zhao, *Anal. Chem.*, 2017, **89**, 10384–10390.
- 7 J. Shepherd, S. A. Hilderbrand, P. Waterman, J. W. Heinecke, R. Weissleder and P. Libby, *Chem. Biol.*, 2007, **14**, 1221–1231.
- 8 Q. Duan, P. Jia, Z. Zhuang, C. Liu, X. Zhang, Z. Wang, W. Sheng, Z. Li, H. Zhu, B. Zhu and X. Zhang, *Anal. Chem.*, 2019, **91**, 2163–2168.
- 9 T. Yang, J. Sun, W. Yao and F. Gao, *Dyes Pigm.*, 2020, **180**, 108435.
- 10 Q. Xu, K.-A. Lee, S. Lee, K. M. Lee, W.-J. Lee and J. Yoon, *J. Am. Chem. Soc.*, 2013, **135**, 9944–9949.
- 11 W. Shu, L. Yan, Z. Wang, J. Liu, S. Zhang, C. Liu and B. Zhu, *Sens. Actuat. B Chem.*, 2015, **221**, 1130–1136.
- 12 S. Goswami, A. K. Das, A. Manna, A. K. Maity, P. Saha, C. K. Quah, H. K. Fun and H. A. Abdel Aziz, *Anal. Chem.*, 2014, **86**, 6315–6322.
- 13 P. Xing, K. Gao, B. Wang, J. Gao, H. Yan, J. Wen, W. Li, Y. Xu, H. Li, J. Chen, W. Wang and S. Sun, *Chem. Commun.*, 2016, **52**, 5064–5066.
- 14 C. Liu, Z. Li, C. Yu, Y. Chen, D. Liu, Z. Zhuang, P. Jia, H. Zhu, X. Zhang, Y. Yu, B. Zhu

- and W. Sheng, *ACS Sens.*, 2019, **4**, 2156–2163.
- 15 B. Zhu, L. Wu, M. Zhang, Y. Wang, C. Liu, Z. Wang, Q. Duan and P. Jia, *Biosens. Bioelectron.* 2018, **107**, 218–223.
- 16 L. Xu, M. Wu, L. Zhao, H. Han, S. Zhang, P. Ma, Y. Sun, X. Wang and D. Song, *Talanta*, 2020, **215**, 120892.
- 17 H. Teng, J. Tian, D. Sun, M. Xiu, Y. Zhang, X. Qiang, H. Tang and Y. Guo, *Sens. Actuat. B Chem.* 2020, **319**, 128288.
- 18 Y. Zhou, J. Y. Li, K.-H. Chu, K. Liu, C. Yao and J. Y. Li, *Chem. Commun.*, 2012, **48**, 4677.
- 19 J. Nie, H. Sun, B. Miao and Z. Ni, *Dyes Pigm.*, 2020, **181**, 108590.
- 20 S. Liu, D. Yang, Y. Liu, H. Pan, H. Chen, X. Qu and H. Li, *Sens. Actuat. B Chem.*, 2019, **299**, 126937.
